# Supplementary material
Source: PubMed Central journal article supplement (PMC5729741)
Supplement: NIHMS854461-supplement-supplemental_data.pdf [file NIHMS854461-supplement-supplemental_data.pdf]

**Supplementary data**

**Overall summary of subject incidence of treatment-emergent adverse events in double-blind phase**

|                                                                                 | <b>Cinacalcet</b><br><b>(N = 33)</b> | <b>Placebo</b><br><b>(N = 34)</b> |
|---------------------------------------------------------------------------------|--------------------------------------|-----------------------------------|
| <b>Subjects with treatment-emergent adverse events, n (%)</b>                   | <b>27 (81.8)</b>                     | <b>20 (58.8)</b>                  |
| Serious adverse events                                                          | 3 (9.1)                              | 4 (11.8)                          |
| Leading to discontinuation of investigational product                           | 2 (6.1)                              | 1 (2.9)                           |
| Leading to discontinuation from study                                           | 0 (0.0)                              | 1 (2.9)                           |
| Fatal adverse events                                                            | 1 (3.0)                              | 0 (0.0)                           |
| <b>Subjects with treatment-related treatment emergent adverse events, n (%)</b> | <b>14 (42.4)</b>                     | <b>8 (23.5)</b>                   |
| Serious adverse events                                                          | 0 (0.0)                              | 0 (0.0)                           |
| Leading to discontinuation of investigational product                           | 1 (3.0)                              | 0 (0.0)                           |
| Leading to discontinuation from study                                           | 0 (0.0)                              | 0 (0.0)                           |
| Fatal adverse events                                                            | 0 (0.0)                              | 0 (0.0)                           |
| <b>Identified risks, n (%)</b>                                                  |                                      |                                   |
| Hypocalcemia                                                                    | 0 (0.0)                              | 0 (0.0)                           |
| Seizure/convulsions                                                             | 0 (0.0)                              | 0 (0.0)                           |
| Hypotension                                                                     | 1 (3.0)                              | 1 (2.9)                           |
| Cardiac failure                                                                 | 0 (0.0)                              | 0 (0.0)                           |
| Hypersensitivity                                                                | 0 (0.0)                              | 1 (2.9)                           |
| <b>Potential risks, n (%)</b>                                                   |                                      |                                   |
| Acute pancreatitis                                                              | 0 (0.0)                              | 0 (0.0)                           |
| Drug-related hepatic disorders                                                  | 1 (3.0)                              | 0 (0.0)                           |
| Fractures                                                                       | 3 (9.1)                              | 1 (2.9)                           |
| Ischemic heart disease                                                          | 0 (0.0)                              | 1 (2.9)                           |

|                                                                |                |                |
|----------------------------------------------------------------|----------------|----------------|
| Nervous system disorders                                       | 7 (21.2)       | 7 (20.6)       |
| Ventricular tachyarrhythmias                                   | 0 (0.0)        | 0 (0.0)        |
| <b>Subjects reporting events adjudicated by the CEC, n (%)</b> | <b>1 (3.0)</b> | <b>1 (2.9)</b> |
| Death                                                          | 1 (3.0)        | 0 (0.0)        |
| Hospitalization for unstable angina                            | 0 (0.0)        | 1 (2.9)        |
| <b>Events confirmed by adjudication, n (%)</b>                 | <b>1 (3.0)</b> | <b>0 (0.0)</b> |
| Death                                                          | 1 (3.0)        | 0 (0.0)        |
